# Supplementary material
Source: publisher figshare collection journal article supplement (https://frontiersin.figshare.com/ndownloader/files/13076945)
Supplement: Supplementary file [file 13076945]

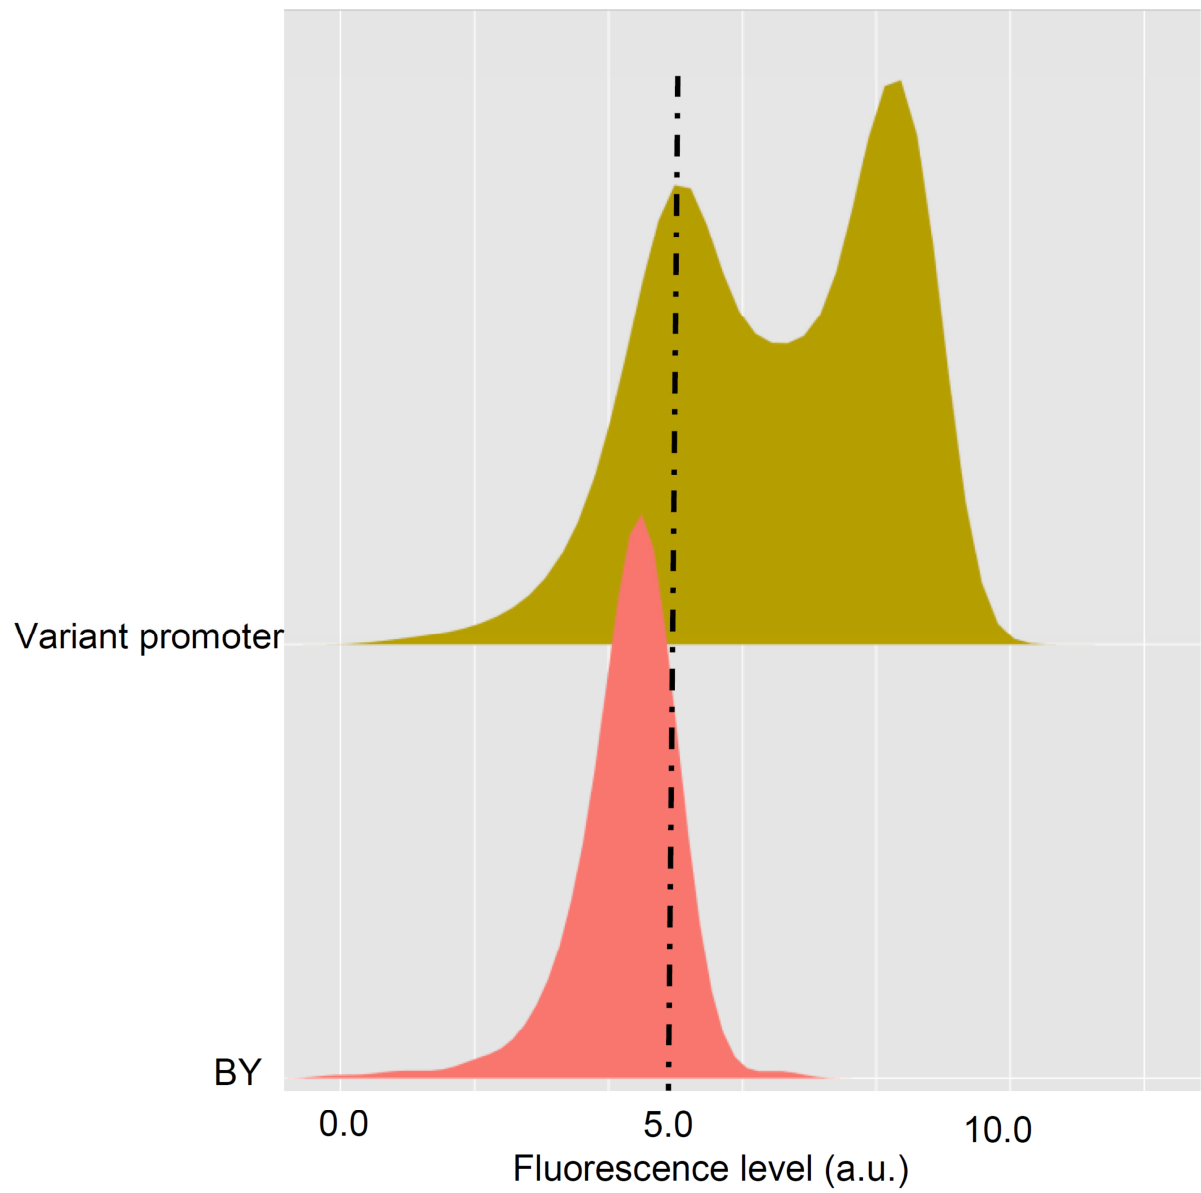

**Supplementary Figure 2.** Expression profile conferred by the noisiest variant *pGRX1* compared to the auto-fluorescence background of the control strain BY4741.
